# Supplementary material for: Rare-Earth-Doped Calcium Carbonate Exposed to X-ray Irradiation to Induce Reactive Oxygen Species for Tumor Treatment
Source: MDPI journal article supplement (doi:10.3390/ijms20051148), 2019-03-06
Supplement: s1 [file s1]

# Rare-earth-doped Calcium Carbonate exposed to X-ray to induce Reactive Oxygen Species for Tumor Treatment

Chun-Chen Yang<sup>a</sup>, Wei-Yun Wang<sup>a</sup>, Feng-Huei Lin<sup>b, c, \*</sup>, Chun-Han Hou<sup>d, \*</sup>

<sup>a</sup> Department of Materials Science and Engineering, National Taiwan University, Taipei 10617, Taiwan

<sup>b</sup> Institute of Biomedical Engineering, National Taiwan University, Taipei 10617, Taiwan

<sup>c</sup> Institute of Biomedical Engineering and Nanomedicine, National Health Research Institutes, Miaoli 35053, Taiwan

<sup>d</sup> Department of Orthopedic Surgery, National Taiwan University, Taipei 10617, Taiwan

Corresponding Author

\* Chun-Han Hou: phone, +886-2-23123456#65274; fax, +886-2-23971266; Email, [chhou@ntu.edu.tw](mailto:chhou@ntu.edu.tw).

\* Feng-Huei Lin: phone, +886-2-27327474; fax, +886-2-27327474; Email, [double@ntu.edu.tw](mailto:double@ntu.edu.tw).

Table S1. CaCO<sub>3</sub>:Ce measured by BET.

|                       |                                                                                                                                                            |
|-----------------------|------------------------------------------------------------------------------------------------------------------------------------------------------------|
| CaCO <sub>3</sub> :Ce | BET Surface Area :<br>35.8875±0.1818 m <sup>2</sup> /g<br>Correlation Coefficient: 0.9999237<br>Langmuir Surface Area: 48.6989±0.6808<br>m <sup>2</sup> /g |
|-----------------------|------------------------------------------------------------------------------------------------------------------------------------------------------------|

|  |                                                                                                                                                     |
|--|-----------------------------------------------------------------------------------------------------------------------------------------------------|
|  | Correlation Coefficient: 0.9996093<br>BJH Adsorption Average Pore Diameter :<br>1295.3808 Å<br>BJH Desorption Average Pore Diameter :<br>1228.4492Å |
|--|-----------------------------------------------------------------------------------------------------------------------------------------------------|
